1 Mitochondrial DNA variants segregate during human preimplantation  
2 development into genetically different cell lineages that are  
3 maintained postnatally

4 Joke Mertens,<sup>1</sup> Joke.Mertens@vub.be

5 Marius Regin,<sup>1</sup> Marius.Regin@vub.be

6 Neelke De Munck,<sup>2</sup> Neelke.DeMunck@uzbrussel.be

7 Edouard Couvreu de Deckersberg,<sup>1</sup> Edouard.Couvreu.De.Deckersberg@vub.be

8 Florence Belva,<sup>3</sup> Florence.Belva@uzbrussel.be

9 Karen Sermon,<sup>1</sup> Karen.Sermon@vub.be

10 Herman Tournaye,<sup>2,4,5</sup> Herman.Tournaye@uzbrussel.be

11 Christophe Blockeel,<sup>2</sup> Christophe.Blockeel@uzbrussel.be

12 Hilde Van de Velde,<sup>2</sup> Hilde.VandeVelde@uzbrussel.be

13 Claudia Spits,<sup>1\*</sup> Claudia.Spits@vub.be

14 <sup>1</sup>Research Group Reproduction and Genetics, Faculty of Medicine and Pharmacy, Vrije Universiteit  
15 Brussel (VUB), 1090 Brussels, Belgium

16 <sup>2</sup>Center for Reproductive Medicine, UZ Brussel, 1090 Brussels, Belgium

17 <sup>3</sup>Center for Medical Genetics, UZ Brussel, 1090 Brussels, Belgium

18 <sup>4</sup>Research Group Biology of the testis, Faculty of Medicine and Pharmacy, Vrije Universiteit Brussel  
19 (VUB), 1090 Brussels, Belgium

20 <sup>5</sup>Department of Obstetrics, Gynecology, Perinatology and Reproduction, Institute of Professional  
21 Education, Sechenov First Moscow State Medical University of the Ministry of Health of the Russian  
22 Federation, 119992, Moscow

23 \*Corresponding author, email address: [Claudia.Spits@vub.be](mailto:Claudia.Spits@vub.be) , telephone number: +32 (0)2 477 46

24 38

25

## 26 ABSTRACT

27 Humans present remarkable mitochondrial DNA (mtDNA) variant mosaicism, not only across tissues  
28 but even across individual cells within one person. The timing of the first appearance of this  
29 mosaicism has not yet been established. In this study, we hypothesized it occurs during  
30 preimplantation development. To investigate this, we deep-sequenced the mtDNA of 254 oocytes  
31 from 85 donors, 158 single blastomeres of 25 day-3 embryos, 17 inner cell mass and trophectoderm  
32 samples of 7 day-5 blastocysts, 142 bulk DNA and 68 single cells of different adult tissues. We found  
33 that day-3 preimplantation embryos already present blastomeres that carry variants unique to that  
34 cell, showing that the first events of mtDNA mosaicism happen very early in human development.  
35 We classified the mtDNA variants based on their recurrence or uniqueness across sibling oocytes and  
36 embryos, and between single cells and samples from the same embryos or adult individuals. Variants  
37 that recurred across samples had higher heteroplasmic loads and more frequently resulted in  
38 synonymous changes or were located in non-coding regions than variants that were unique to one  
39 oocyte or single embryonic cell. These differences were maintained through developmental stages,  
40 suggesting that the mtDNA mosaicism arising in preimplantation development is maintained into  
41 adulthood. Further, the results support a model in which close clustering of mitochondria carrying  
42 specific mtDNA variants in the ooplasm leads to asymmetric distribution of these mitochondria  
43 throughout the cell divisions of the preimplantation embryo, resulting in the appearance of the first  
44 form of mtDNA mosaicism in human development.

## 45 INTRODUCTION

46 The vast majority of studies in human genetics have been performed on bulk DNA, extracted from  
47 peripheral blood or other tissues. In recent years it has become increasingly obvious that the cells of  
48 our body are not as genetically homogeneous as previously thought. Next to the already classically  
49 well-known cases of cellular mosaicism, such as the variation in the somatic rearrangements of  
50 immunoglobulin and T-cell receptor in lymphocytes, a whole new dimension of diversity is just being  
51 uncovered owing to the emergence of single cell comprehensive genome analysis<sup>1</sup>. The mutations  
52 driving somatic mosaicism probably occur at all stages of development, from early preimplantation  
53 development, as seen for chromosomal abnormalities<sup>2</sup>, to the ageing individual<sup>1</sup>.

54 The mitochondrial DNA (mtDNA) is, in this sense, particularly diverse. It is known for long that a given  
55 inherited mtDNA mutation can be present in different loads in different individuals of the same  
56 family, and in different tissues of the same individual<sup>3</sup>, and somatic cellular heterogeneity has been  
57 shown in blood cells<sup>4,5</sup>, neurons, glia<sup>6</sup>, and single muscle fibers<sup>7</sup>. In recent years, the advent of  
58 massive parallel sequencing has had a deep impact on the field of mitochondrial genetics. The fact

59 that the relatively small mtDNA can be sequenced at high depth has facilitated the simultaneous  
60 detection of all variants within this genome and their individual heteroplasmic loads<sup>8,9</sup>. This type of  
61 deep sequencing work has shown, for instance, that pathogenic mtDNA variants are commonly  
62 present in healthy individuals, with a mean load of 2% and cross-generation studies have shown that  
63 these variants are heritable<sup>8-10</sup>.

64 The composition and heteroplasmic load of the variants in the mtDNA of an individual can vary  
65 during development, as it goes through various bottlenecks. The first bottleneck occurs during  
66 oogenesis, where the few mtDNA copies in the primordial germ cells replicate rapidly, having  
67 increased a thousand-fold when reaching the mature oocyte stage. During this process, low-load  
68 heteroplasmic variants in early primordial germ cells can increase to much higher loads in the late  
69 primordial germ cells, where selection mechanisms will eliminate mitochondria with variants  
70 affecting their functionality<sup>11</sup>. This selection process circumvents Muller's ratchet, an evolutionary  
71 process where deleterious variants can accumulate rapidly over generations in an irreversible  
72 manner due to uniparental inheritance and lack of genomic recombination of the mtDNA<sup>12</sup>. This first  
73 bottleneck is also responsible for the diversity in heteroplasmic loads of the same variant across  
74 children of the same mother. The second bottleneck occurs after fertilization, where the mtDNA copy  
75 number per cell declines transiently during early embryonic development due to halted replication,  
76 which is resumed when the embryonic cells initiate differentiation<sup>13,14</sup>. Finally, later in development,  
77 the mtDNA becomes susceptible to somatic mutagenesis due to errors of the polymerase gamma, its  
78 proximity to reactive oxygen species and a very low protection against mutagenesis by repair  
79 mechanisms and histones<sup>15-17</sup>, leading to ageing-related somatic mosaicism (reviewed by van den  
80 Aamele et al. in 2020<sup>18</sup>).

81 Several studies have demonstrated mtDNA mosaicism for both disease and non-disease-causing  
82 variants, both at the single-cell level and across tissues of one individual<sup>19-22</sup>. While some of this  
83 variation has been attributed to ageing<sup>20</sup>, the recurrence of other mosaic variants across multiple  
84 cells of the same individual suggests that the variant emerged very early in development, after or  
85 during the formation of the three germ layers. Other variants appear to be tissue-specific, leading to  
86 the suggestion that mtDNA variant composition can be cell-type specific<sup>21,22</sup>. Overall, these mosaic  
87 mtDNA variants can be present in one cell at a very high load, while in other cells it is at a very low  
88 load or not present at all. These differences across cells of the same individual could be explained  
89 through clonal expansion by random genetic drift. Because this process is considered to be relatively  
90 slow, the initial event has been proposed to occur early in development, but the exact timing and  
91 mechanism remain to be elucidated<sup>23</sup>.

92 Currently, all the knowledge on the segregation of mtDNA variants during early human development  
93 is based on the study of inherited pathogenic mtDNA mutations, mostly in the context of

94 preimplantation genetic testing. A significant number of studies have explored the possibility of  
95 quantifying pathogenic heteroplasmic variants in polar bodies, single blastomeres biopsied at the  
96 cleavage stage or trophectoderm biopsies at the blastocyst stage and have investigated if the results  
97 of these biopsies are representative of the rest of the embryo. Work has been published on the  
98 segregation of mutations causing mitochondrial diseases such as Leigh syndrome<sup>24,25</sup>, NARP<sup>26</sup>,  
99 Lieber's disease<sup>27</sup> and MERF/MELAS<sup>28-31</sup>. With some exceptions<sup>31</sup>, the different groups have found a  
100 good consistency in heteroplasmic loads between samples of the same embryo, showing that these  
101 variants are homogeneously distributed across the mitochondria in the oocyte, and homogeneously  
102 partitioned during the early developmental cell divisions. Conversely, there is no knowledge on the  
103 appearance and segregation of non-disease causing mtDNA variants during early human  
104 development.

105 In this study, we aimed at determining the timing of appearance mosaicism for non-disease  
106 associated mtDNA variants during human preimplantation development. We studied to which extent  
107 individual embryonic cells differed from each other and identified different types of mtDNA variants  
108 depending on their recurrence across samples of the same donor. Comparison of the patterns of  
109 mtDNA variants in oocytes, day-3 and day-5 embryos, and adult-stage tissues and single cells  
110 revealed that mtDNA mosaicism appears as early as day 3 of human development, and is maintained  
111 through development, resulting in genetically diverse cell lineages in the adult.

## 112 MATERIAL AND METHODS

### 113 **Sample and single-cell collection**

114 All buccal (N=59), blood (N=57) and urine (N=26) samples and oocytes (N=254) and embryos on day 3  
115 (n=25) or at the blastocyst stage (n=7) were obtained after signed informed consent from the donors  
116 at the Center for Medical Genetics and the Brussels IVF Center for Reproductive Medicine of the UZ  
117 Brussel (Supplementary table S1). Supernumerary oocytes were donated after oocyte pick-up while  
118 preimplantation embryos were donated for research after the legally determined cryostorage period  
119 of 5 years passed<sup>32</sup>. Prior to the start of the study, approval was acquired from the Local Ethical  
120 Committee of the Vrije Universiteit Brussel and the Universitair Ziekenhuis Brussel, and by the  
121 Federal Ethical Committee on Medical and Scientific Research on embryos in vitro.

122 Day-3 embryos were warmed using the Vitrification Thaw kit (Vit Kit-Thaw, Irvine Scientific, USA)  
123 according to manufacturer's instructions. Subsequently, they were left to recover in 25  $\mu$ L droplets of  
124 Origio blastocyst medium (Origio, The Netherlands) for 3h in an incubator at 37°C with 89% N<sub>2</sub>, 6%  
125 CO<sub>2</sub> and 5% O<sub>2</sub>. The day-3 embryos and oocytes were freed from their zona pellucida by incubating  
126 them in a droplet of pronase (100 mg/100 $\mu$ L human tubal fluid) and by gently pipetting them up and

127 down. The inner cell mass (ICM) and trophectoderm (TE) samples were biopsied from day-5  
128 blastocysts that were diagnosed as affected by a monogenic disease after preimplantation genetic  
129 testing, as previously described<sup>19</sup>. The oocytes, embryos, ICM and TE samples and adult single cells  
130 were washed three times in Ca<sup>2+</sup>- and Mg<sup>2+</sup>-free medium. The individual blastomeres obtained from  
131 cleavage stage embryos dissociated in the Ca<sup>2+</sup>- and Mg<sup>2+</sup>-free medium were washed three additional  
132 times before collecting in 2.5 µL ALB (alkaline lysis buffer) as described before<sup>33</sup>. The samples were  
133 kept at -20°C until further processing. The bulk DNA of the somatic tissues was extracted using a kit  
134 according to manufacturer's instructions (DNeasy Blood and Tissue, Qiagen).

### 135 **mtDNA enrichment and massive parallel sequencing**

136 Before PCR, the single oocytes and blastomeres, ICM/TE biopsies from the day-5 blastocysts and  
137 adult cells were incubated at 65°C for 10 min to ensure full lysis of the cells. Long-range PCR<sup>34</sup> was  
138 performed using a primer set to generate amplicons of 13 Kbp (5042f – 1424r). The primer  
139 sequences for the primer set were 5'-AGCAGTTCTACCGTACAACC-3' (forward) and 5'-  
140 ATCCACCTTCGACCCTAAG-3' (reverse). The amplification was done in a total volume of 50 µL per  
141 sample containing 10 µL of LongAmp buffer, 2 µL of Taq DNA polymerase (LongAmp Taq DNA  
142 Polymerase kit, New England Biolabs), 7.5 µL of dNTPs (dNTP set, Illustra™), 2 µL of each primer (10  
143 µM), 2.5 µL Tricine (200mM, Sigma-Aldrich) and 21.5 µL H<sub>2</sub>O. The PCR protocol started with an  
144 initiation step of 30 sec at 94°C followed by a touchdown of 8 cycles of 15 sec at 94°C, 30 sec at 64°C  
145 (-0.4°C per cycle) and 11 min at 61°C, 29-37 cycles were added of 15 sec at 94°C, 30 sec at 61°C and  
146 11 min at 65°C and completed with a final elongation step of 11 min at 65°C. Successful amplification  
147 was confirmed using agarose gel electrophoresis (1.5%). After PCR purification with AMPure beads  
148 (Beckmann Coulter), library preparation as described in Mertens et al.<sup>34</sup>, was performed using the  
149 TruSeq DNA PCR-free Library Preparation kit (Illumina). The amplicons were sheared using a  
150 Covaris™ M220 sonicator (Life Technologies), following instrument specification to generate  
151 fragments of ± 100 base pairs. The detection of the nucleotide sequence was done on the Illumina  
152 NovaSeq6000 platform using the according kit (Illumina).

### 153 **Data analysis and bioinformatics processing**

154 The generated data was aligned to the reference genome (NC\_012920.1) with BWA-MEM and  
155 uploaded to mtDNA server<sup>35</sup> (v1.1.3) which detected the homoplasmic (>98.5% frequency) and  
156 heteroplasmic (<98.5% frequency) single nucleotide variants (SNV) as well as the haplogroup and  
157 possible contaminations. Insertions and deletions were detected and SNVs were confirmed by  
158 Mutect2<sup>36</sup> (GATK v3.6 Mutect2). The annotations of the variants were done using MitoWheel and the  
159 possible amino-acid changes were identified using MutPred2<sup>37</sup>. A more detailed protocol of the

160 bioinformatic processing and the validation of the full sequencing setup can be found in our  
161 previously published work<sup>19,34,38</sup>.

## 162 **Statistics**

163 Statistics were performed using the two-tailed Fisher's exact or the Chi-square test, p-values <0.05  
164 were considered significant.

## 165 **RESULTS**

### 166 **Mitochondrial DNA mosaicism occurs as early as day 3 of human development**

167 We deep-sequenced the mtDNA of 254 oocytes from 85 donors, 158 single blastomeres from 25 day-  
168 3 embryos obtained from 9 donors, 17 samples from 7 day-5 blastocysts (7 ICM and 10 TE), 142 adult  
169 DNA samples from bulk tissue (59 buccal, 57 blood and 26 urine samples) and 68 single cells from  
170 buccal swab (N=37) and urine (N=31) of 3 donors. For the oocytes, we collected at least two samples  
171 per donor (either two or more oocytes of the same donor or oocytes and somatic tissues) and for the  
172 adult DNA samples we also collected at least two tissues per donor.

173 We identified heteroplasmic variants in 58.7% of the oocytes, 86.1% of blastomeres of day-3  
174 embryos, in all of the ICM/TE samples of day-5 blastocysts, 47.9% of the adult bulk tissues and 95.6%  
175 of adult single cells (Figure 1a). The average heteroplasmic variant load was under 10% for the  
176 oocytes and embryos (oocytes:  $7.6 \pm 13.8\%$ , day-3 blastomeres:  $6.1 \pm 11.2\%$  and day-5 ICM/TE  
177 biopsies:  $5.1 \pm 5.5\%$ ),  $20.1 \pm 27.6\%$  for the adult bulk tissues and  $12.1 \pm 13.6\%$  in adult single cells  
178 (Figure 1b).

179 Further analysis of the variants showed that while some of the variants recurred across samples of  
180 the same donor, other variants were unique to one sample. Therefore, in the further downstream  
181 analysis of our dataset, we categorized the heteroplasmic variants as "recurrent" when they were  
182 present in multiple tissues of one individual, multiple cells of one day-3 embryo, different biopsies of  
183 a day-5 blastocyst or in multiple oocytes of one donor, and as "unique" when they were present in  
184 only one sample. An example of the variant composition of different sample types is shown in figure  
185 1c-g. The full datasets can be found in Table S2-S5. We found recurrent mtDNA variants in 26.8% of  
186 oocytes, 76.0% of day-3 embryos, 85.7% of day-5 blastocysts, 38.7% of adult bulk DNA samples and  
187 47.1% of adult single cells. Unique variants were found in 48.0% of oocytes, 92.0% of day 3 embryos,  
188 85.7% of day 5 blastocysts, 16.9% of bulk DNA samples and 85.3% single cells.

189 Overall, the data revealed considerable mtDNA variation across oocytes of the same donor, showing  
190 that germ line mosaicism for non-disease associated mtDNA variants is exceedingly common. In the  
191 embryos, we found that somatic mtDNA mosaicism occurs already on day-3 of development and is

192 maintained in day-5 blastocysts. This first type of mosaicism is due to the appearance of unique  
193 variants in individual cells of the embryo. At this stage of development variants that recur across cells  
194 of the embryo do so consistently at very similar loads. These recurrent variants are the source of a  
195 second type of somatic mosaicism that emerges later in development and that is evidenced by the  
196 results of the adult tissues and single cells. Here, we found that the heteroplasmic load of variants  
197 measured in a DNA sample extracted from a given tissue represent the average of the widely variable  
198 loads found in the individual cells in that tissue, ranging from a homoplasmic state to absent in some  
199 cells (Figure 1f). Finally, a third type of mosaicism is present in the adult single cells, in the form of  
200 numerous unique variants that have most likely originated by somatic mutagenesis related to ageing.  
201 Interestingly, we have identified four such variants that appear in a tissue-specific manner in  
202 different donors: m.215A>G and m.152T>C were found in buccal samples of 7 donors, m.16311T>C in  
203 blood and buccal samples of 2 donors and m.72T>C in urine samples of 2 donors.

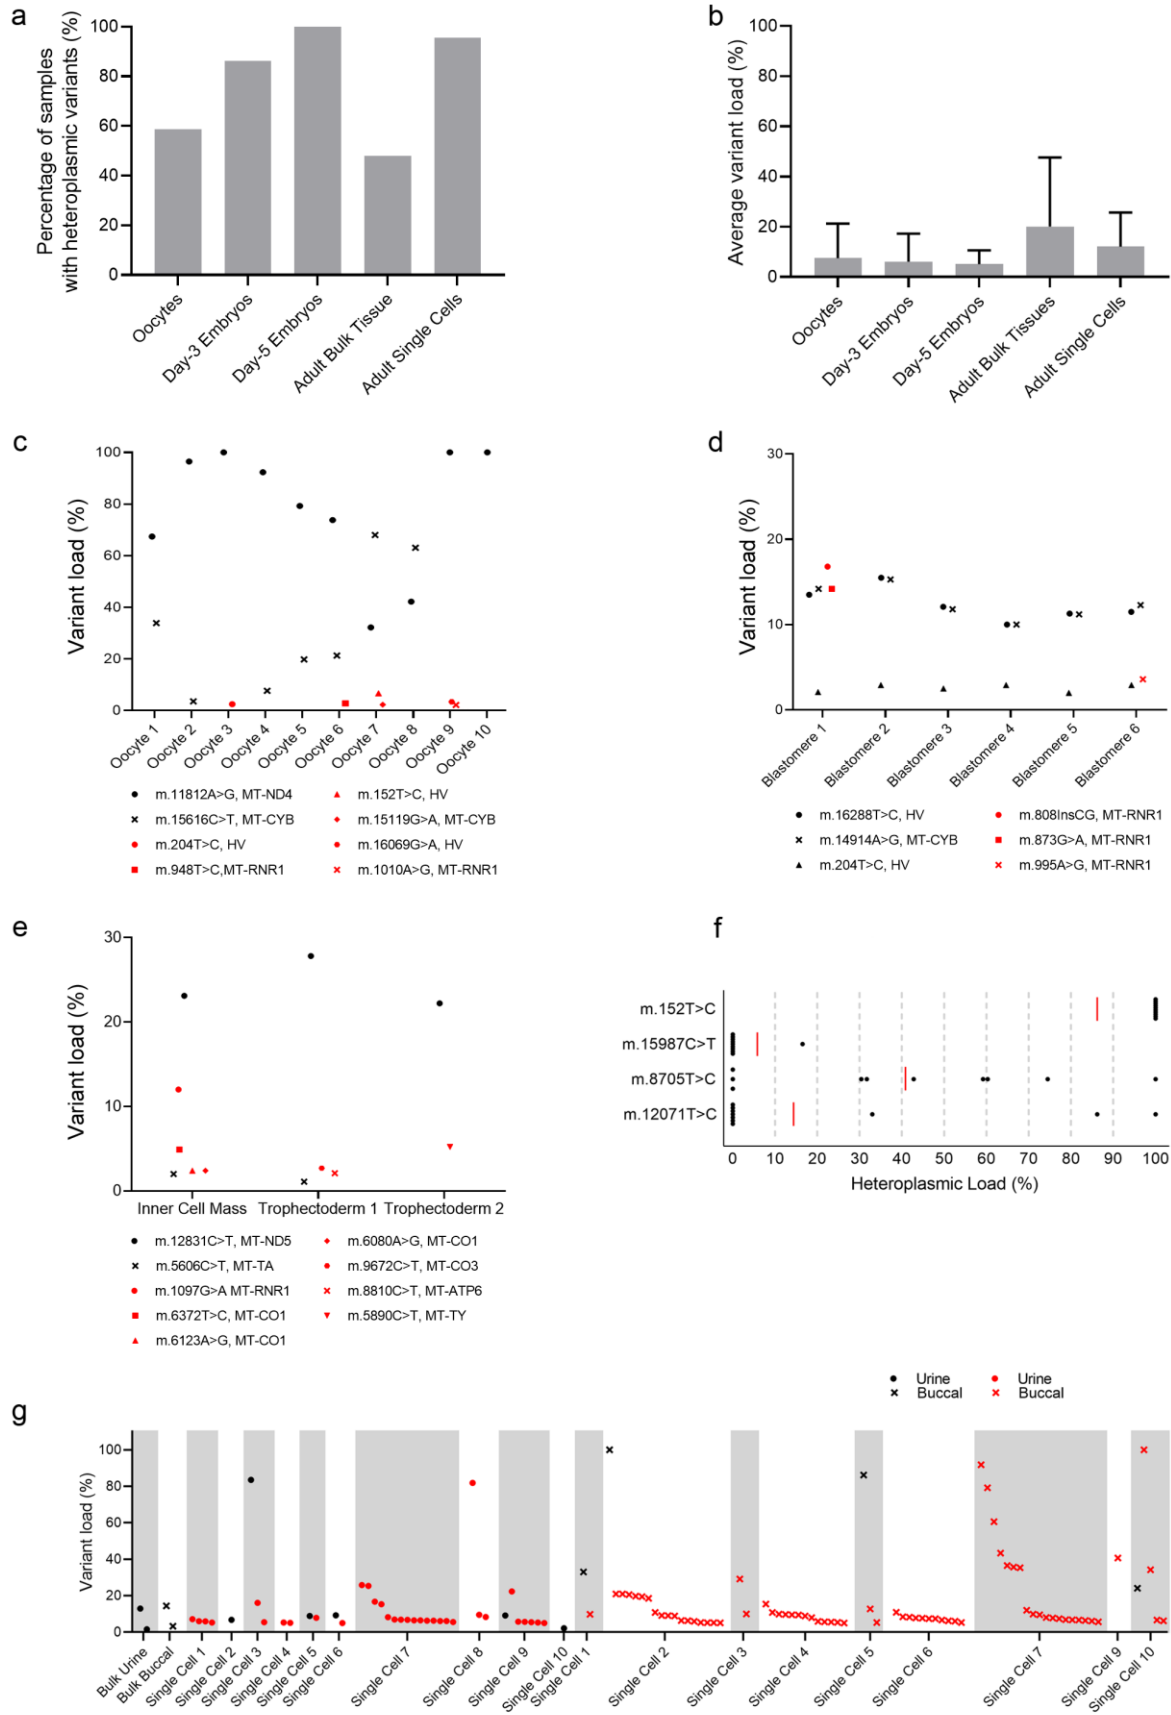



205 **Figure 1. Overview of the heteroplasmic variants found in the different cohorts.** **a.** Percentage of  
206 samples with heteroplasmic variants in oocytes, day-3 embryos and day-5 blastocysts, adult bulk  
207 tissues and adult single cells. **b.** The average load and standard deviation of the heteroplasmic  
208 variants found in the oocytes, day-3 embryos and day-5 blastocysts, adult bulk tissues and adult  
209 single cells. **c-e:** Examples of variants and their respective load found in oocytes from the same donor  
210 (c), blastomeres from the same day-3 embryo (d) and biopsies from the same day-5 blastocysts (e).  
211 Variants that recur across cells or samples are shown in black and in red are variants that are unique  
212 to one sample. **f.** Heteroplasmic load of recurrent variants found in the bulk DNA sample (red line)  
213 and in the single cells from the same tissue (black dots). **g.** Variants found in the adult bulk DNA and  
214 in 10 single cells of urine and buccal samples that were recurrent across bulk and single cells (black  
215 dots for the urine samples and black crosses for the buccal samples) and variants that were unique to  
216 one cell (red dots for the urine cells and crosses for the buccal cells).

### 217 **Sibling oocytes carry both recurrent and unique variants that differ in location, type and** 218 **heteroplasmic load**

219 In 26.8% of the oocytes, we found variants that recurred across two or more of the oocytes of the  
220 same donor. These variants were evenly distributed between the non-coding and protein-coding  
221 regions, and none were detected in the rRNA/tRNA-coding sequences. A non-synonymous change  
222 was induced by 16.7% of the variants (Figure 2a). We calculated the mutation rate per base as the  
223 number of variants found in each mtDNA locus, divided by the number of sequenced base pairs of  
224 that locus. In the oocytes, the highest mutation rate per base was in the hypervariable region (Figure  
225 2b). Of recurrent variants in the oocyte, 61.1% had heteroplasmic loads over 20% (Figure 2c), while  
226 their load was independent from their location or type of change (Figure 2d).

227 We sequenced somatic tissues (buccal swabs, blood and urine) from a subgroup of 25 oocyte donors.  
228 In these, 9 variants were present in at least one somatic tissue and were transmitted to the oocytes  
229 (referred to as “transmitted”) and 3 variants were only present in the oocytes and not in the somatic  
230 tissues (referred to as “germline-specific”). Both types of variants were similarly distributed across  
231 non-coding and protein-coding regions with a distribution of 55.6 versus 44.4% for the transmitted  
232 variants and 66.7 versus 33.3% for the germline-specific variants. However, the transmitted protein-  
233 coding variants were exclusively synonymous while the germline-specific protein-coding variants  
234 were all non-synonymous (Figure 2e). Of the transmitted variants, 77.8% were present at loads  
235 >20%, while this was only 33.3% for the germline-specific variants, although this difference was not  
236 significant (Fisher’s exact test,  $p=0.2364$ , Figure 2f). Lastly, the higher the load in the somatic tissues,  
237 the higher the likelihood that the variant would be present in the majority of the oocytes of the  
238 donor (correlation  $R=0.65$ ,  $p<0.0001$ ), with variants with loads as low as 3% in the somatic tissues

239 being identified as well in the oocytes. Conversely, the heteroplasmic load of the variant could  
240 significantly differ from oocyte to oocyte, in extreme cases going from undetectable levels in one  
241 oocyte to homoplasmy in another (Figure 2g).

242 Nearly half (48.0%) of oocytes carried variants that were unique to one oocyte in a cohort, and these  
243 were remarkably different in their location and heteroplasmic load from the recurrent variants. Of  
244 the unique variants, 16.3% were located in the rRNA/tRNA regions (vs 0% of the recurrent variants,  
245 Fisher's exact test,  $p=0.103$ , Figure 2a) and 21.1% of the unique protein-coding variants induced a  
246 non-synonymous change (vs 16.7% of the recurrent variants, Fisher's exact test,  $p=1$ , Figure 2a). On a  
247 per-gene base, *MT-ND6* had lower mutation rates per base in the unique than in the recurrent  
248 variants (Fisher's exact test,  $p=0.038$ , Figure 2b). The unique variants had lower heteroplasmic loads  
249 than the recurrent ones, with 80.0% of the unique variants having loads below 5% (vs 16.7% of  
250 recurrent variants with loads <5%, Chi-square test,  $p<0.0001$ , Figure 2c). In the unique variants, we  
251 found that the rRNA and tRNA variants were exclusively found at loads <5% (Figure 2h), and that the  
252 incidence of non-synonymous protein-coding variants with loads >10% was slightly higher than that  
253 of synonymous variants (Fisher's exact test,  $p=0.043$ , Figure 2h).

254 Overall, these results show that half of oocytes differ from their siblings within a cohort due to the  
255 presence of variants unique to them. These unique variants differ from the recurrent variants in their  
256 location and load, being more frequently located in the rRNA and tRNA genes, and more often  
257 resulting in a non-synonymous change. Conversely, their pathogenic potential may be limited by  
258 their low heteroplasmic load, which in most cases was below 5%.

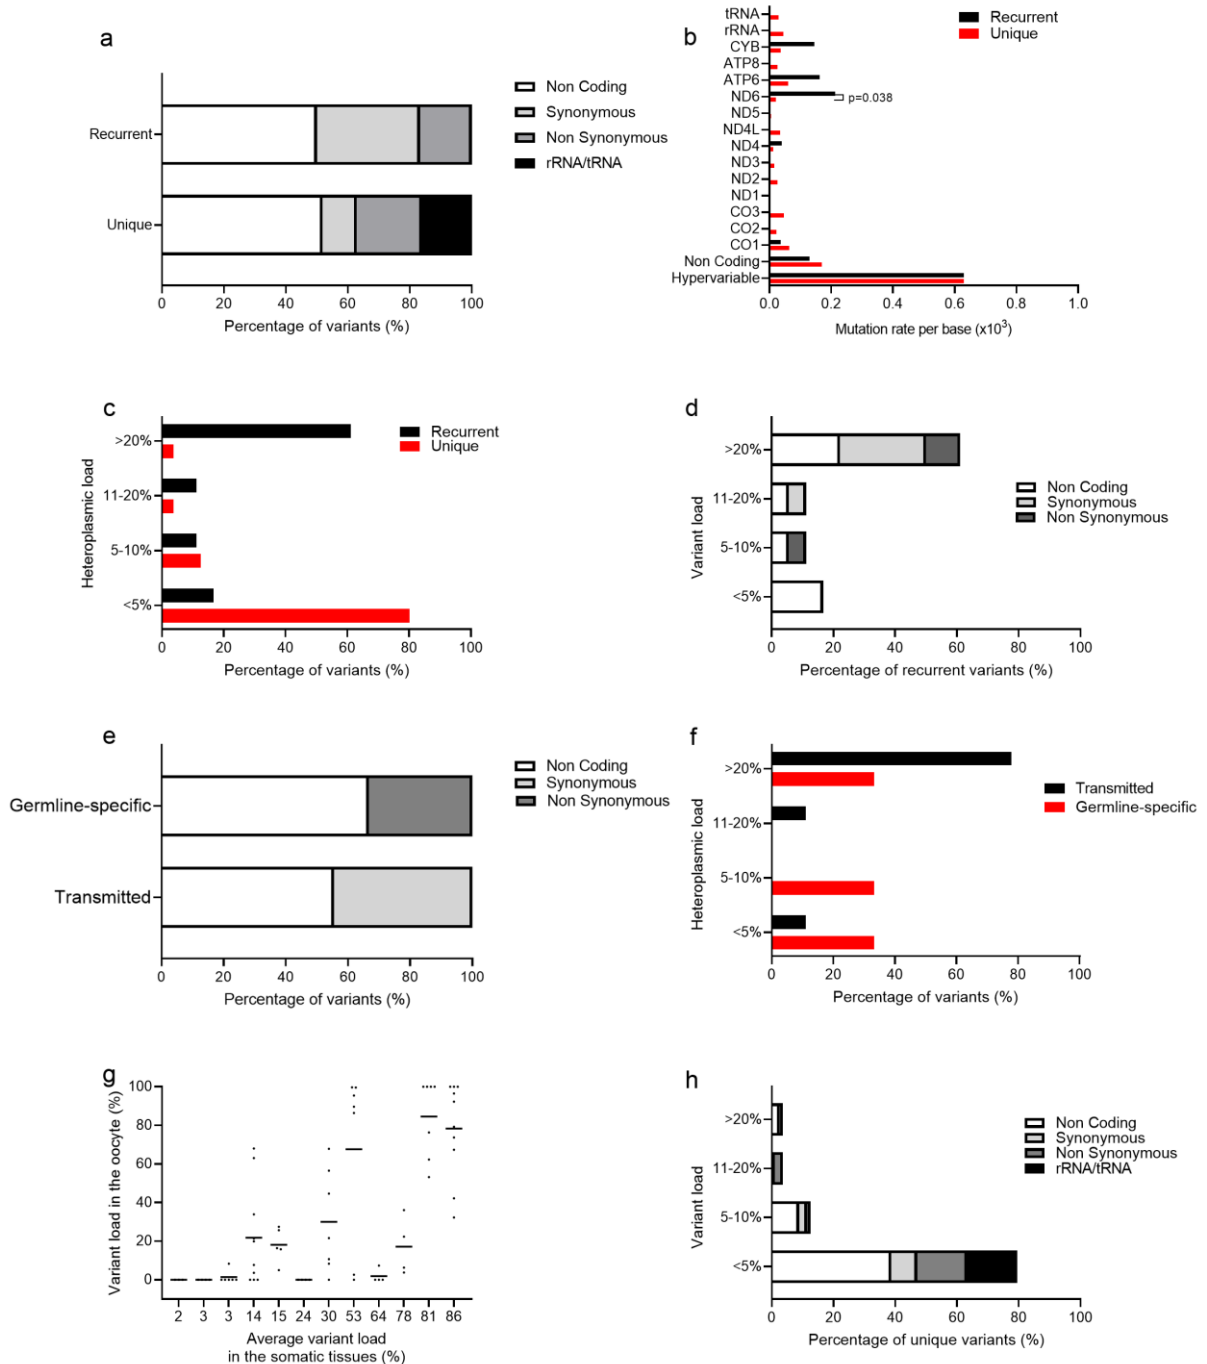

259

260 **Figure 2. Sibling oocytes carry both recurrent and unique variants that differ in location, type and**  
 261 **heteroplasmic load. a.** Distribution of recurrent and unique variants in oocytes based on their  
 262 location or type (in case of a variant in the protein-coding regions) in the mitochondrial genome  
 263 (non-coding, protein-coding synonymous, protein-coding non-synonymous or rRNA/tRNA-coding  
 264 regions). **b.** Mutation rate per base for the recurrent and unique variants in the oocytes. Variants in  
 265 the gene *MT-ND6* were more likely to be recurrent (Fisher's exact test,  $p=0.038$ ). **c.** Recurrent and  
 266 unique variants in the oocytes categorized for their variant load. **d.** Recurrent variants in the oocytes

267 categorized for their load and distribution in the mtDNA. **e.** Distribution in the mtDNA based on their  
268 location or type of the recurrent variants in the oocytes categorized whether they were present in  
269 the somatic tissues of the donor (“Transmitted”) or only present in the oocytes of the donor and not  
270 in the somatic tissues (“Germline-specific”). **f.** Recurrent transmitted and germline-specific variants in  
271 oocytes categorized for their variant load. **g.** Example of transmitted variants where the average load  
272 in the somatic tissues is plotted against the load of the same variant in the oocytes of the respective  
273 donor. **h.** Unique variants in the oocytes categorized for their load and distribution in the mtDNA.

#### 274 **The differences between unique and recurrent variants in oocytes are maintained during** 275 **preimplantation development**

276 Figure 3a shows an example of the variants found in each of the single blastomeres of two sibling  
277 embryos. The variants were categorized as recurrent across sibling embryos, recurrent across  
278 blastomeres (but not across the siblings) and unique to each blastomere. We reasoned that, further  
279 in development, the variants that are recurrent across oocytes of one donor become variants  
280 recurring across sibling embryos. Six variants of this type were found in nine embryos from the 4 sets  
281 of sibling day-3 embryos, with a similar distribution and heteroplasmic load as the recurrent variants  
282 we found in the oocytes. Half were located in the non-coding region and the other half in the  
283 protein-coding region, 16.7% being non-synonymous changes, the highest mutation rate per base  
284 being in the hypervariable region and 66.7% of variants having a heteroplasmic load over 20% (Figure  
285 3b, Figure 3d and Figure 3f).

286 The second type of recurrent variant, which appears in multiple cells of the same day-3 embryo, but  
287 not between embryos of the same cohort, is found in 60% of embryos. These variants were located  
288 in 61.9% of cases in the non-coding region, 38.1% were in protein-coding sequences, 23.8% inducing  
289 non-synonymous changes, and none were found in the rRNA/tRNA regions (Figure 3b). The mutation  
290 rate per base was highest for the hypervariable region (Figure 3d). This distribution was maintained  
291 in the day-5 blastocysts, with 71.4% of variants in the non-coding region, 28.6% in the protein-coding  
292 regions, and none in the rRNA/tRNA, and with the highest mutation rate per base in the  
293 hypervariable region (Figure 3c and Figure 3e). On day 3, 9.5% of recurrent variants had loads >20%  
294 and 71.4% <5%, of which most were present in the non-coding regions (Figure 3f and Figure 3h).  
295 Noticeably, the recurrent protein-coding variants inducing non-synonymous changes were  
296 exclusively seen at loads <10%, while synonymous variants often showed loads >10% (Figure 3h).  
297 This distribution changed slightly on day 5, with 28.6% of recurrent variants having loads >20% and  
298 57.1% <5%, the majority of which located in the non-coding regions (Figure 3g and Figure 3j).  
299 Remarkably, in both stages of development, these recurrent variants showed heteroplasmic loads  
300 that differed in average 3.5% across cells or biopsies, and maximally in 13.4%. This consistency is in

301 line with previous reports on inherited pathogenic mtDNA variants detected during preimplantation  
302 genetic testing<sup>39</sup>. This shows that during the very early stages of development, these recurrent  
303 variants are homogeneously distributed to the daughter cells, suggesting that they were evenly  
304 distributed in the cytoplasm of the original oocyte. These variants restricted to one embryo differ  
305 from the ones found recurrently across embryos of the same cohort in their heteroplasmic load  
306 (71.4% of the recurrent variants across blastomeres have loads <5% vs 66.7% of the recurrent  
307 variants across siblings have loads >20%) but not in their location.

308 With regards to the unique variants, the difference in location was more prominent in the day-3  
309 embryos, where 41.0% of the unique variants were located in the rRNA/tRNA regions as compared to  
310 none of the recurrent variants (Fisher's exact test,  $p < 0.0001$ , Figure 3b). This was also seen when  
311 looking at the mutation rate per base, where the mutation rate of the hypervariable region was  
312 significantly higher in the recurrent variants than in the unique (Fisher's exact test,  $p < 0.0001$ ) and the  
313 rRNA regions showed higher rates in the unique variants (Fisher's exact test,  $p = 0.0003$ , Figure 3d).  
314 On day 3, 83.1% of the unique variants and 71.4% of the recurrent variants had a heteroplasmic load  
315 <5% (Chi-square test,  $p < 0.0001$ , Figure 3f). Most of the variants with a load <5% were protein-coding  
316 variants with a similar distribution between synonymous and non-synonymous variants (Figure 3i).

317 On day 5 of development, the variants in the hypervariable region were more likely to be recurrent  
318 (Fisher's exact test,  $p = 0.0047$ , Figure 3e) while the unique rRNA/tRNA variants represented only  
319 20.0% of the variants (Fisher's exact test,  $p = 0.55$ , Figure 3c). The heteroplasmic loads were still  
320 different though not significant due to the limited sample size, with 85.0% of the unique variants and  
321 57.1% of the recurrent variants having loads <5% (Fisher's exact test,  $p = 0.29$ , Figure 3g), the majority  
322 of which located in the protein-coding regions inducing non-synonymous changes (Figure 3k).

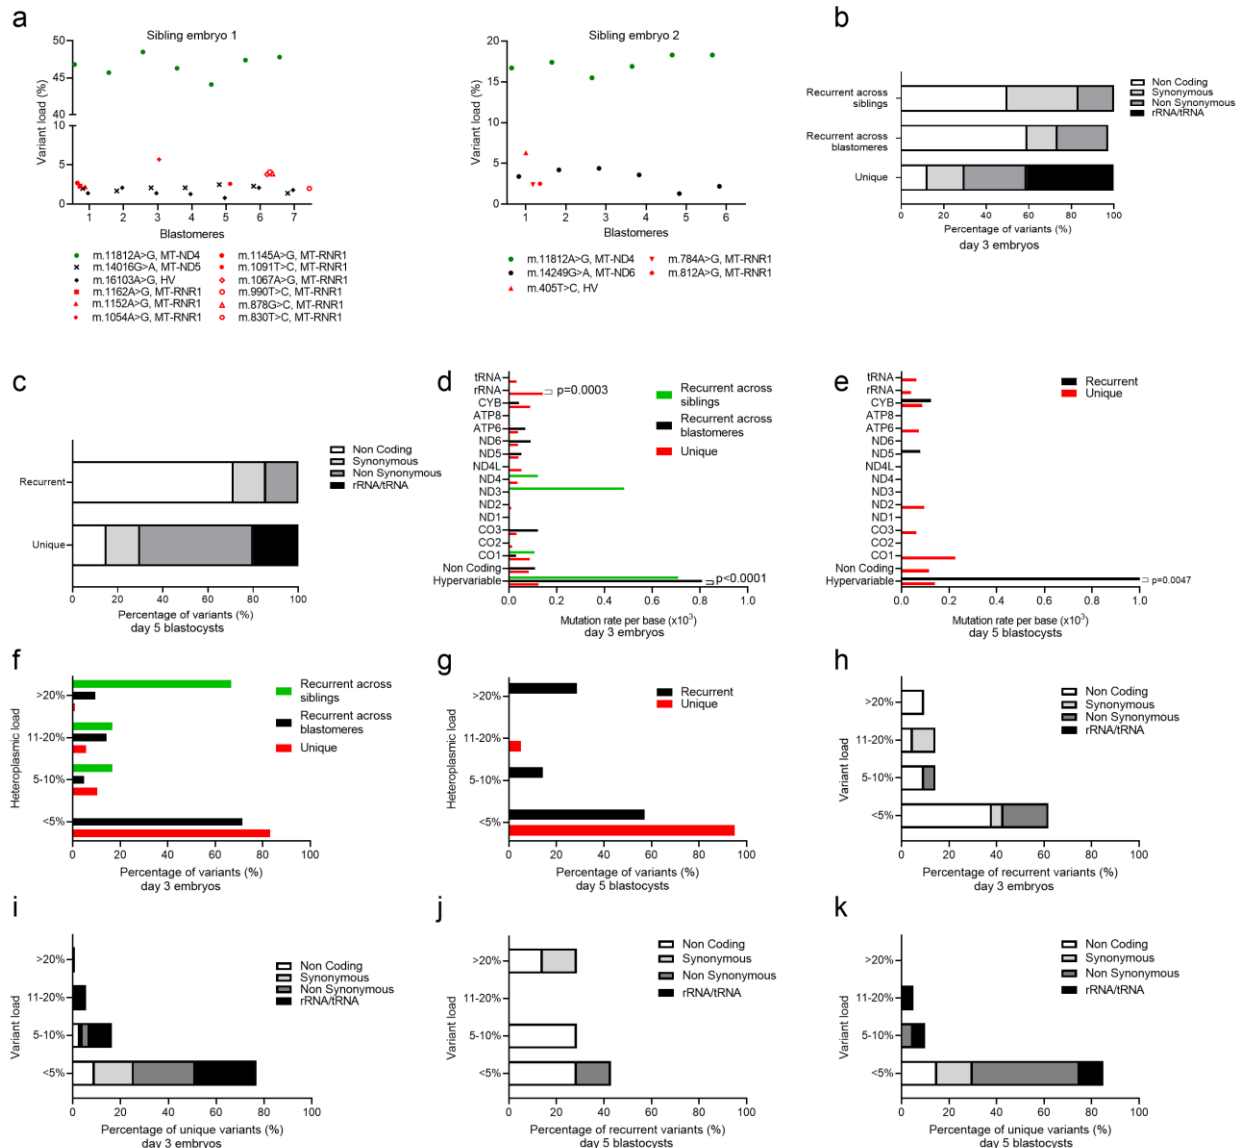

323

324 **Figure 3. The differences in unique and recurrent variants are further maintained during**

325 **preimplantation development. a.** Example of two sibling embryos carrying recurrent variants across

326 siblings (green dots), recurrent variants across blastomeres of the same embryo but not recurring

327 across siblings (black dots) and unique variants that are unique to one blastomere (red symbols). **b.**

328 Distribution of recurrent across siblings, recurrent across blastomeres and unique variants in day-3

329 embryos based on their location or type. **c.** Distribution of recurrent and unique variants in day-5

330 blastocysts based on their location or type. **d.** Mutation rate per base for the recurrent across

331 siblings, recurrent across blastomeres and unique variants in the day-3 embryos. Variants in the

332 hypervariable regions were more likely to be recurrent across blastomeres (Fisher's exact test,

333  $p<0.0001$ ) and variants in the rRNA regions were more likely to be unique (Fisher's exact test,

334  $p=0.0003$ ). **e.** Mutation rate per base for the recurrent and unique variants in the day-5 blastocysts.

335 Variants in the hypervariable regions were more likely to be recurrent (Fisher's exact test,  $p=0.0047$ ).

336 **f.** Recurrent across siblings, recurrent across blastomeres and unique variants in the day-3 embryos  
337 categorized for their variant load. **g.** Recurrent and unique variants in the day-5 blastocysts  
338 categorized for their variant load. **h.** Variants recurrent across blastomeres in the day-3 embryos  
339 categorized for their load and distribution in the mtDNA. **i.** Unique variants in the day-3 embryos  
340 categorized for their load and distribution in the mtDNA. **j.** Recurrent variants in the day-5  
341 blastocysts categorized for their load and distribution in the mtDNA. **i.** Unique variants in the day-5  
342 blastocysts categorized for their load and distribution in the mtDNA.

### 343 **The cells carrying unique mtDNA variants in embryos likely give rise to stable lineages in adult** 344 **individuals**

345 In 38.7% of the bulk adult tissues, we found variants that recurred between at least two samples of  
346 the same individual. These variants resembled the recurrent variants found in the oocytes and across  
347 sibling embryos, with 45.5% located in the non-coding regions, 48.5% in the protein-coding  
348 sequences and only a small proportion in the rRNA/tRNA coding regions (6.1%) (Figure 4a). The  
349 mutation rate per base was highest in the hypervariable region (Figure 4b), and most frequently had  
350 loads >20% (Figure 4c). Further, there were no differences in the type of variants in function of their  
351 variant load (Figure 4d). Also, 16.7% of the samples carried unique variants. Of these, 66.7% were  
352 found in the non-coding regions while no variants were located in the rRNA/tRNA regions (Figure 4a),  
353 and the mutation rate per base was as expected highest in the hypervariable region (Figure 4b). Of  
354 the unique variants, 85.2% had loads <5%, which was significantly different compared to 24.2% of  
355 the recurrent variants (Fisher's exact test,  $p < 0.0001$ , Figure 4c), of which 65.2% were located in the  
356 non-coding regions (Figure 4e). In sum, the only difference between the recurrent and unique  
357 variants in the bulk DNA samples was their heteroplasmic load.

358 Next, we studied single cells of two tissues of three individuals. In this part, we set the threshold for  
359 variant calling at >5% to ensure a more conservative calling. The main reason for this is the higher  
360 number of PCR cycles required to amplify the mtDNA of these cells, which could result in an increase  
361 in false positives. Of the adult single cells, 47.1% carried recurrent mtDNA variants (found in at least  
362 two different cells from one individual, irrespective of the tissue of origin), while unique variants  
363 appeared in 85.3% of cells. In total, we identified 19 recurrent variants and 642 unique variants in the  
364 68 single cells. Furthermore, not all recurrent variants in the single cells were identified in the bulk  
365 samples of the same tissues, as the average of the loads of all cells could drop below the sequencing  
366 detection limit.

367 The location of the recurrent and unique variants in the adult single cells was very similar, with most  
368 variants located in coding and tRNA/rRNA loci, and this in contrast with the variants identified in the  
369 bulk tissues. Protein-coding variants were more frequent at the single-cell level than in the bulk

370 tissues (recurrent bulk 48.5% vs single-cell 68.4%, Chi-square,  $p < 0.0001$ , unique bulk 33.3% vs single-  
371 cell 83.3%, Chi-square,  $p < 0.0001$ ) reminiscent of the unique variants in the day-3 and day-5  
372 blastocysts, suggesting that the cells carrying unique variants in the preimplantation embryos can  
373 give rise to stable lineages in terms of mtDNA variants in the adult individual. In the same line, there  
374 were no differences between the recurrent and unique single-cell variants in mutation rate per base  
375 across the different loci (Figure 4g) but these were significantly different to their counterparts in bulk  
376 tissues, where the hypervariable region had the highest mutation rate per base. As in the bulk  
377 tissues, recurrent variants tended to have higher variant loads than the unique variants, and no  
378 differences were found in location according to heteroplasmic load (Figure 4h, Figure 4i, Figure 4j).  
379 Finally, we controlled the recurrent and unique single-cell variants for the type of base pair change  
380 they induce, and found no differences in the incidence of transitions, transversions or insertions and  
381 deletions (Figure S1).



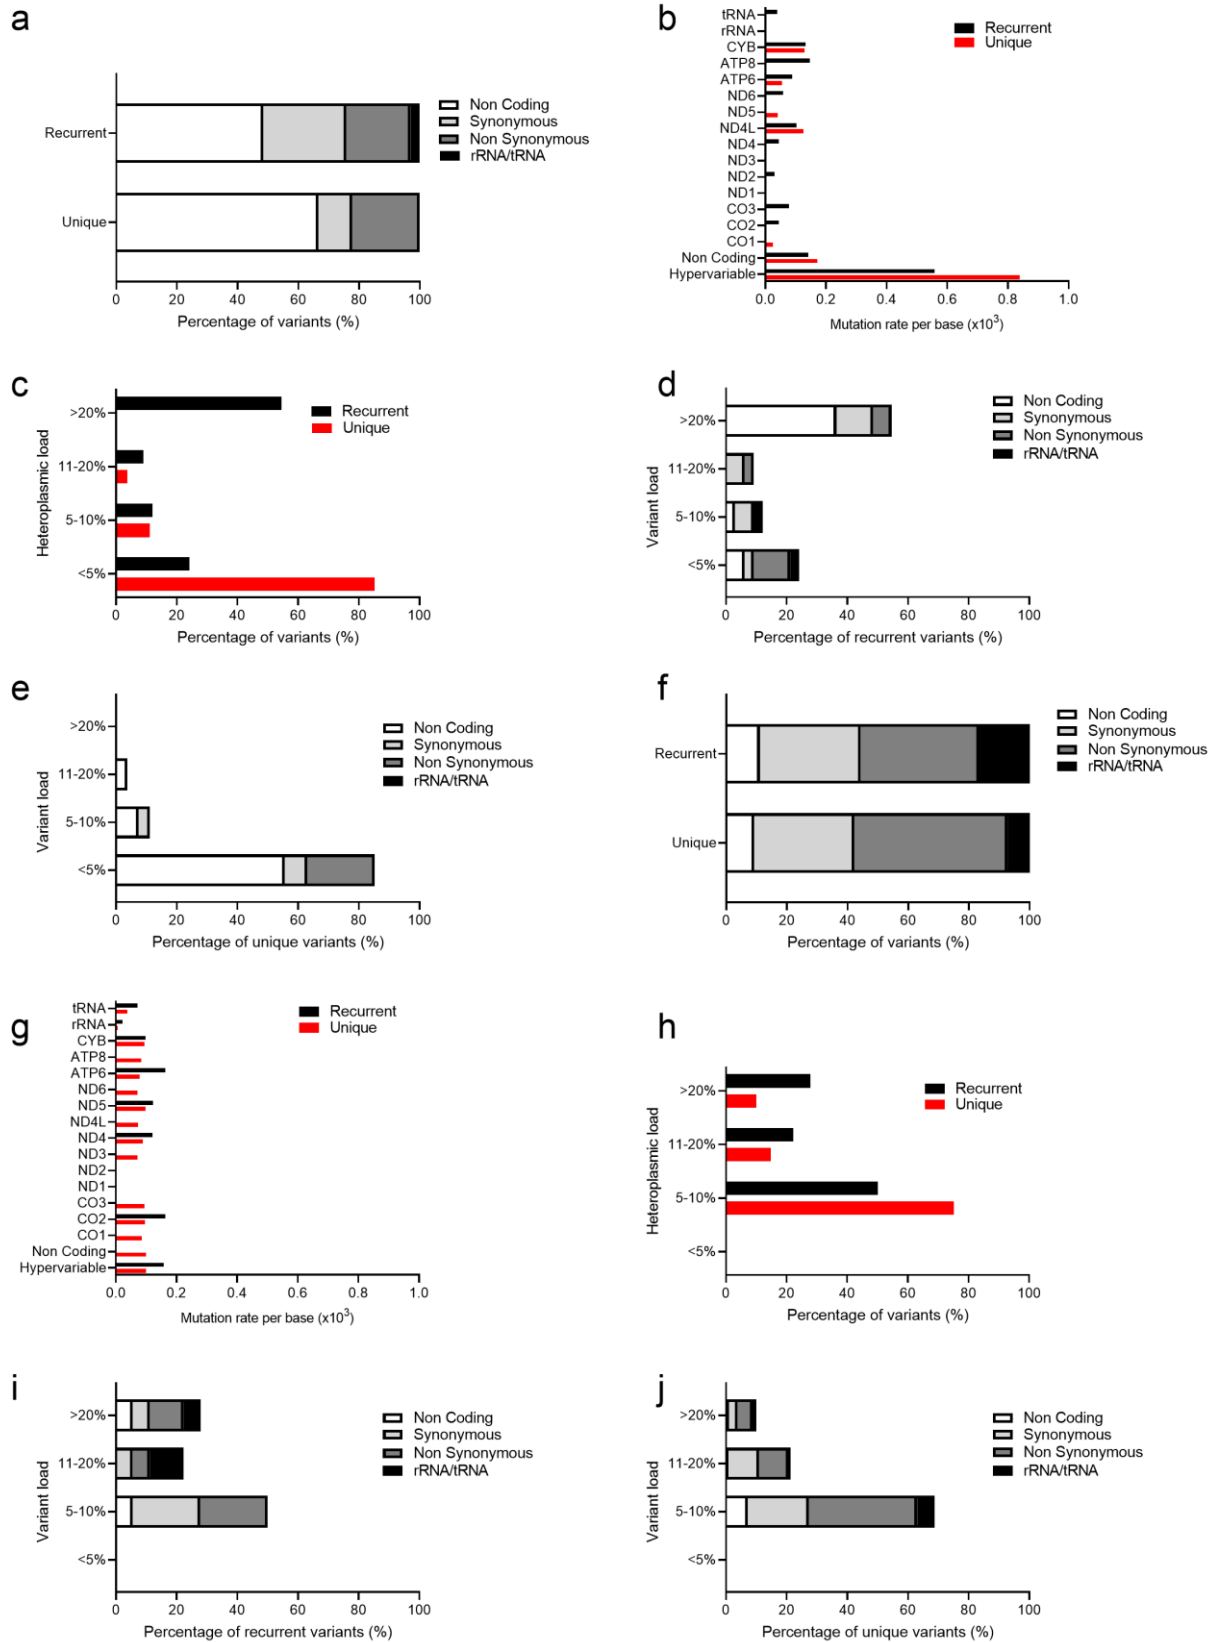

382

383 **Figure 4. The cells carrying unique mtDNA variants in embryos give rise to stable lineages in adult**

384 **individuals. a. Distribution of recurrent and unique variants in adult bulk tissues based on their**

385 location or type. **b.** Mutation rate per base for the recurrent and unique variants in adult bulk tissues.  
386 **c.** Recurrent and unique variants in adult bulk tissues categorized for their variant load. **d.** Recurrent  
387 variants in adult bulk tissues categorized for their load and distribution in the mtDNA. **e.** Unique  
388 variants in adult bulk tissues categorized for their load and distribution in the mtDNA. **f.** Distribution  
389 of recurrent and unique variants in adult single cells based on their location or type. **g.** Mutation rate  
390 per base for the recurrent and unique variants in adult single cells. **h.** Recurrent and unique variants  
391 in adult single cells categorized for their variant load. **i.** Recurrent variants in adult single cells  
392 categorized for their load and distribution in the mtDNA. **j.** Unique variants in adult single cells  
393 categorized for their load and distribution in the mtDNA.

## 394 DISCUSSION

395 In this study we deep-sequenced the mtDNA of a large cohort of human oocytes, blastomeres of day-  
396 3 embryos, small groups of cells of day-5 blastocysts, and single cells as well as bulk DNA of different  
397 somatic adult tissues. We identified three different types of mtDNA variants based on their  
398 recurrence or uniqueness across siblings, single cells or samples from the same individuals. These  
399 types of variants are differently distributed throughout the regions of the mtDNA and show  
400 differences in variant load.

401 In early development, the similarities between the low-load unique variants in the oocytes and the  
402 unique variants in the day-3 and day-5 blastocysts on one hand, and between the recurrent variants  
403 in the oocytes and recurrent across sibling embryos on the other hand leads us to propose the  
404 following model of segregation for each type of variant (illustrated in Figure 5). The recurrent  
405 variants across oocytes are the equivalent of the recurrent variants across sibling embryos (Figure  
406 5a), while the variants that are recurrent restricted to one embryo are the equivalent of the unique  
407 variants in oocytes that are found at higher heteroplasmic loads. We propose that both these  
408 variants are homogeneously distributed in mitochondria of the ooplasm, and therefore  
409 homogeneously segregated in the blastomeres throughout the cleavages (Figure 5b).

410 Finally, we hypothesize that variants that are unique to a single blastomere would originate from the  
411 low-load unique variants in the oocytes (Figure 5c). This can be explained if these variants are found  
412 in a low number of mitochondria that cluster together in the ooplasm. It is likely that these low-load  
413 unique variants in the oocyte arise postnatally during folliculogenesis due to replication of a  
414 subpopulation of mtDNA molecules, as demonstrated in a mouse model, while the high-load unique  
415 variants were already present in the primordial germ cells after the first bottleneck<sup>40</sup>. This would  
416 explain why the low-load unique variants in the oocytes (and unique across blastomeres) are more  
417 frequently non-synonymous and in rRNA/tRNA loci than the high-load unique variants in oocytes

418 (and recurrent across blastomeres), since the latter were subjected to the selecting effect of the  
419 germline bottleneck<sup>11</sup>.

420 During the first embryonic cleavages, this co-localization would result in an asymmetric distribution  
421 of mitochondria containing the variant, leading to an embryo that already presents mosaicism as  
422 early as day 3 of development. This same pattern would continue through to the blastocyst stage,  
423 where sister cells tend to remain in proximity of each other. These lineages persist throughout  
424 development, and in the adult individual as supported by the study of Lee et al. in 2012<sup>41</sup>.

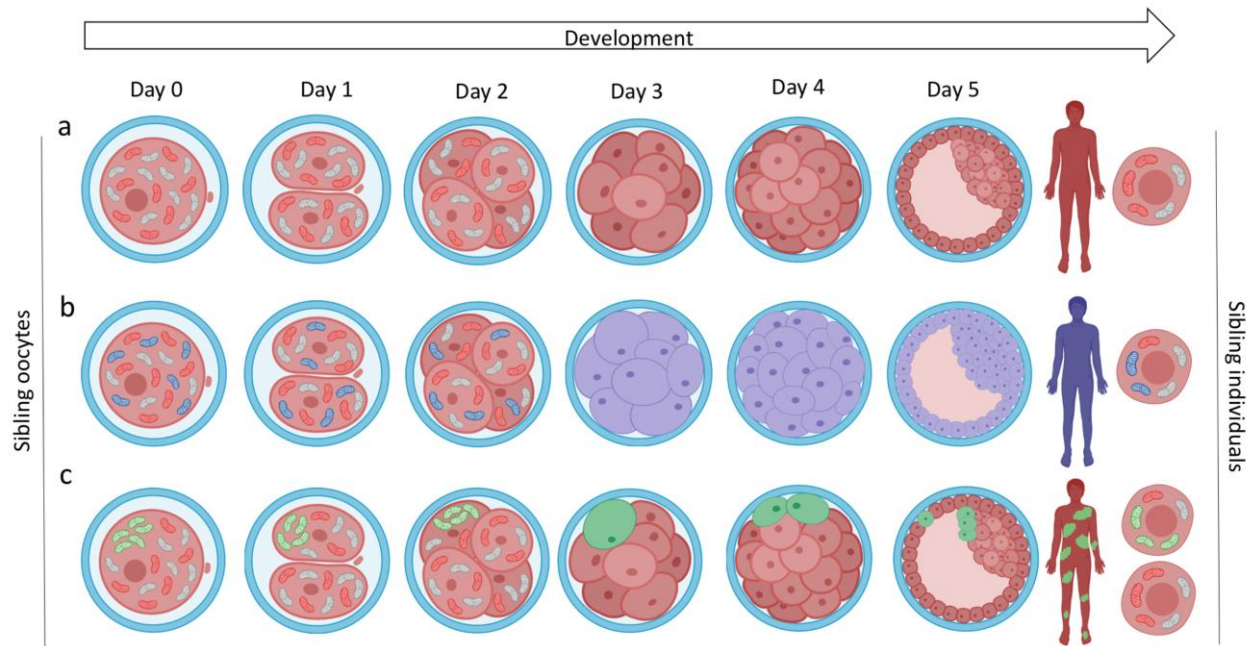

425  
426 **Figure 5. Proposed segregation model of recurrent and unique variants in the preimplantation**  
427 **development.** The figure shows the development of three oocytes of the same donor, resulting in  
428 three sibling individuals. Mitochondria in red (a-c) are carrying variants that are recurrent across  
429 sibling oocytes and individuals. The mitochondria in blue (b) carry unique variants at higher loads in  
430 the oocyte and are homogenously distributed together with the red mitochondria in the ooplasm.  
431 They remain in a similar distribution during development and become the variants found as unique in  
432 one individual, but present in all their tissues. The mitochondria in green (c) carry unique variants at  
433 lower loads and cluster in the ooplasm. These mitochondria will remain in close proximity to each  
434 other during the cleavage stages and will be present in only one blastomere. This cell will then give  
435 rise to a lineage of cells -that in the adult individual- manifests as a subpopulation of rare cells  
436 carrying this same variant, potentially across different germ layers. This figure was created with  
437 BioRender.

438 It is plausible that this type of segregation of mtDNA variants is a common event during the cleavage-  
439 stages of mammalian development. Work on mice and Rhesus monkeys have shown that this type of  
440 segregation indeed occurs in the preimplantation period of these two models<sup>41,42</sup>. Also, work on

441 human embryos has shown that asymmetrical mitochondrial distribution can result in a proportion of  
442 blastomeres with a reduced mitochondrial pool<sup>43</sup>, which could contribute to the fixing of mtDNA  
443 variants in the clonally derived blastomeres.

444 Despite having identified the unique variants throughout development, it is noteworthy that there is  
445 a decline in unique rRNA and tRNA variants from day 3 to day 5 of development. This suggests the  
446 existence of selection mechanisms during preimplantation development that filter out pathogenic  
447 variants. This selection has been observed later in the mouse development, where deleterious  
448 variants present in the oocyte and in the embryo were found to be selected against by unknown  
449 mechanisms occurring postimplantation and postnatally<sup>44</sup>.

450 Next to possible selection mechanisms, the somatic bottleneck can cause a diverse population of  
451 cells harboring different mtDNA heteroplasmic variants and at different loads to exist. We saw that  
452 the variant load in adult single cells varies widely amongst cells of the same tissue. The number of  
453 cells harboring variants at higher loads could exceed a certain tissue threshold and could increase the  
454 risk of pathologies<sup>45</sup>. This was already described in muscle fibers<sup>46</sup> and the heart<sup>47</sup>.

455 Furthermore, our study confirmed the presence of tissue-specific variants. These variants were  
456 located in the non-coding regions and were in close proximity to regions that regulate the mtDNA  
457 replication. This is in line with the suggestion of Samuels et al.<sup>22</sup> that these variants could have a  
458 beneficial effect on the mtDNA replication in the given tissue. For instance, variant m.72T>C was  
459 already described by two other research groups in liver and kidney tissue<sup>21,22</sup>.

460 In conclusion, our work is the first to comprehensively describe mtDNA mosaicism in early human  
461 development and identifies a subgroup of low-load variants that may give rise to stable lineages of  
462 genetically diverse cells in the adult. We propose that these lineages appear due to asymmetrical  
463 distribution of mitochondria carrying mtDNA variants in the oocyte, which possibly appeared during  
464 folliculogenesis. Finally, future research will give us more insight on the mechanisms behind the  
465 asymmetrical distribution of variants in the oocyte and on the potential implications of this type of  
466 mosaicism in health and disease.

## 467 SUPPLEMENTAL DATA

468 **Table S1. Overview of sample characteristics included in this study.**

|                | Sample size |
|----------------|-------------|
| <b>Oocytes</b> | 254         |
| Donors         |             |
| Oocyte donors  | 44.5% (113) |
| ART Patients   | 55.5% (141) |

|                                          |                 |
|------------------------------------------|-----------------|
| Maturation stage                         |                 |
| M1                                       | 20.1% (51)      |
| GV                                       | 37.4% (95)      |
| M2                                       | 22.4% (57)      |
| Unknown                                  | 20.1% (51)      |
| <b>Embryos</b>                           |                 |
| <b>Day-3 embryos</b>                     | 25              |
| Donor couples                            | 9               |
| Blastomeres                              | 158             |
| Average number of blastomeres per embryo | 6.3             |
| Sibling embryos/pairs                    | 22 of 6 couples |
| <b>Day-5 blastocysts</b>                 | 7               |
| Donor couples                            | 6               |
| Inner Cell Mass                          | 7               |
| Trophectoderm                            | 10              |
| <b>Adult bulk tissues</b>                |                 |
| Donors                                   | 60              |
| Age                                      | 18-55           |
| Buccal                                   | 59              |
| Blood                                    | 57              |
| Urine                                    | 26              |
| <b>Adult single cells</b>                |                 |
| Donors                                   | 3               |
| Age donor 1                              | 26              |
| Age donor 2                              | 27              |
| Age donor 3                              | 55              |
| Buccal                                   | 37              |
| Urine                                    | 31              |

469

470 **Table S2. Example of the variant composition in multiple oocytes from one donor.**

| Oocyte donor 17    | Oocyte |      |       |      |      |      |      |      |       |       |
|--------------------|--------|------|-------|------|------|------|------|------|-------|-------|
| Variant            | 1      | 2    | 3     | 4    | 5    | 6    | 7    | 8    | 9     | 10    |
| m.11812A>G, MT-ND4 | 67.4   | 96.5 | 100.0 | 92.3 | 79.3 | 73.8 | 32.2 | 42.2 | 100.0 | 100.0 |

|                    |      |     |     |     |      |      |      |      |     |     |
|--------------------|------|-----|-----|-----|------|------|------|------|-----|-----|
| m.15616C>T, MT-CYB | 33.9 | 3.6 | 0.0 | 7.7 | 19.8 | 21.3 | 68.0 | 63.1 | 0.0 | 0.0 |
| m.204T>C, HV       | 0.0  | 0.0 | 2.5 | 0.0 | 0.0  | 0.0  | 0.0  | 0.0  | 0.0 | 0.0 |
| m.948T>C, MT-RNR1  | 0.0  | 0.0 | 0.0 | 0.0 | 0.0  | 2.8  | 0.0  | 0.0  | 0.0 | 0.0 |
| m.152T>C, HV       | 0.0  | 0.0 | 0.0 | 0.0 | 0.0  | 0.0  | 6.7  | 0.0  | 0.0 | 0.0 |
| m.15119G>A, MT-CYB | 0.0  | 0.0 | 0.0 | 0.0 | 0.0  | 0.0  | 2.3  | 0.0  | 0.0 | 0.0 |
| m.16069G>A, HV     | 0.0  | 0.0 | 0.0 | 0.0 | 0.0  | 0.0  | 0.0  | 0.0  | 3.4 | 0.0 |
| m.1010A>G, MT-RNR1 | 0.0  | 0.0 | 0.0 | 0.0 | 0.0  | 0.0  | 0.0  | 0.0  | 2.2 | 0.0 |

471

472 **Table S3. Example of the variant composition in multiple blastomeres from one day-3 embryo.**

| Day-3 Embryo 50<br>Variant | Blastomere |      |      |      |      |      |
|----------------------------|------------|------|------|------|------|------|
|                            | 1          | 2    | 3    | 4    | 5    | 6    |
| m.16288T>C, HV             | 13.5       | 15.5 | 12.1 | 10.0 | 11.3 | 11.5 |
| m.14914A>G, MT-CYB         | 14.2       | 15.3 | 11.8 | 10.0 | 11.2 | 12.3 |
| m.204T>C, HV               | 2.1        | 2.9  | 2.5  | 2.9  | 2.0  | 2.9  |
| m.808InsCG, MT-RNR1        | 16.8       | 0.0  | 0.0  | 0.0  | 0.0  | 0.0  |
| m.873G>A, MT-RNR1          | 14.2       | 0.0  | 0.0  | 0.0  | 0.0  | 0.0  |
| m.995A>G, MT-RNR1          | 0.0        | 0.0  | 0.0  | 0.0  | 0.0  | 3.6  |

473 **Table S4. Example of the variant composition in multiple biopsies from one blastocyst.**

| Day-5 Embryo 3<br>Variant | Biopsy          |                 |                 |
|---------------------------|-----------------|-----------------|-----------------|
|                           | Inner Cell Mass | Trophectoderm 1 | Trophectoderm 2 |
| m.12831C>T, MT-ND5        | 23.1            | 27.8            | 22.2            |
| m.1097G>A, MT-RNR1        | 12.0            | 0.0             | 0.0             |
| m.6372T>C, MT-CO1         | 4.9             | 0.0             | 0.0             |
| m.6123A>G, MT-CO1         | 2.4             | 0.0             | 0.0             |
| m.6080A>G, MT-CO1         | 2.4             | 0.0             | 0.0             |
| m.5606C>T, MT-TA          | 2.0             | 1.10            | 0.0             |
| m.9672C>T, MT-CO3         | 0.0             | 2.7             | 0.0             |
| m.8810C>T, MT-ATP6        | 0.0             | 2.1             | 0.0             |
| m.5890C>T, MT-TY          | 0.0             | 0.0             | 5.2             |

474

475 **Table S5. Example of the variant composition in multiple tissues from one individual.**

| Adult Bulk Tissue<br>Oocyte donor 10<br>Variant | Tissue |       |       |
|-------------------------------------------------|--------|-------|-------|
|                                                 | Buccal | Blood | Urine |
|                                                 |        |       |       |

|                   |      |     |       |
|-------------------|------|-----|-------|
| m.203G>A, HV      | 37.4 | 5.3 | 28.43 |
| m.215A>G, HV      | 3.2  | 0.0 | 0     |
| m.9525G>A, MT-CO3 | 1.5  | 4.0 | 2.16  |

476

477 **Figure S1. Number of transitions, transversions and insertions and deletions (indel), categorized for**  
478 **recurrent and unique, found in adult single cells.** No differences were found in the different cohorts.

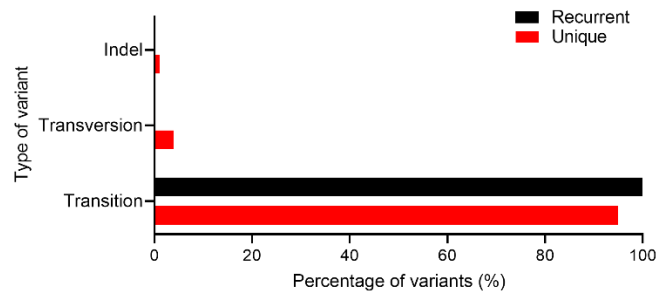

479

## 480 DECLARATION OF INTERESTS

481 The authors declare no competing interests.

## 482 WEB RESOURCES

483 mtDNA server <https://mitoverse.i-med.ac.at/index.html#!run/mtdna-server%40v2.0.0>

484 MitoWheel <http://www.mitowheel.org/mitowheel.html>

485 MutPred2 <http://mutpred.mutdb.org/>

486 BioRender <https://biorender.com/>

## 487 ACKNOWLEDGEMENTS

488 This work was supported by the Scientific Fund Willy Gepts of the UZ Brussel (Wetenschappelijk  
489 Fonds Willy Gepts), the Methusalem Grant of Karen Sermon of the Vrije Universiteit Brussel and the  
490 Research Foundation Flanders (Fonds voor Wetenschappelijk Onderzoek Vlaanderen, FWO  
491 1518418N). M.R. and E.C.D.D. are doctoral fellows at the FWO.

## 492 DATA AND CODE AVAILABILITY

493 The dataset supporting the current study has not been deposited in a public repository because the  
494 participants who donated their genetic material did not agree to share their personal sequencing  
495 information when they signed informed consent. However, researchers can access the data from the  
496 corresponding author on request for further legal use. The data will be formatted in an anonymized

497 Microsoft Excel file where only the type of heteroplasmic variant, the variant load, the tissue of origin  
498 and if the variant was recurrent across samples will be available.

## 499 REFERENCES

- 500 1. Forsberg, L.A., Gisselsson, D., and Dumanski, J.P. (2016). Mosaicism in health and disease — clones  
501 picking up speed. *Nat. Rev. Genet.* 18, 128–142.
- 502 2. Starostik, M.R., Sosina, O.A., and McCoy, R.C. (2020). Single-cell analysis of human embryos reveals  
503 diverse patterns of aneuploidy and mosaicism. *Genome Res.* 30, 814–825.
- 504 3. Stewart, J.B., and Chinnery, P.F. (2015). The dynamics of mitochondrial DNA heteroplasmy:  
505 implications for human health and disease. *Nat. Rev. Genet.* 16, 530–542.
- 506 4. Yao, Y., Ogasawara, Y., Kajigaya, S., Molldrem, J.J., Falcão, R.P., Pintão, M.-C., McCoy, J.P., Rizzatti,  
507 E.G., and Young, N.S. (2007). Mitochondrial DNA sequence variation in single cells from leukemia  
508 patients. *Blood* 109, 756–762.
- 509 5. Ogasawara, Y., Nakayama, K., Tarnowka, M., McCoy, J.P., Kajigaya, S., Levin, B.C., and Young, N.S.  
510 (2005). Mitochondrial DNA spectra of single human CD34+ cells, T cells, B cells, and granulocytes.  
511 *Blood* 106, 3271–3284.
- 512 6. Cantuti-Castelvetri, I., Lin, M.T., Zheng, K., Keller-McGandy, C.E., Betensky, R. a, Johns, D.R., Beal,  
513 M.F., Standaert, D.G., and Simon, D.K. (2005). Somatic mitochondrial DNA mutations in single  
514 neurons and glia. *Neurobiol. Aging* 26, 1343–1355.
- 515 7. Payne, B. a I., Wilson, I.J., Hateley, C. a, Horvath, R., Santibanez-Koref, M., Samuels, D.C., Price,  
516 D.A., and Chinnery, P.F. (2011). Mitochondrial aging is accelerated by anti-retroviral therapy through  
517 the clonal expansion of mtDNA mutations. *Nat. Genet.* 43, 806–810.
- 518 8. Payne, B. a I., Wilson, I.J., Yu-Wai-Man, P., Coxhead, J., Deehan, D., Horvath, R., Taylor, R.W.,  
519 Samuels, D.C., Santibanez-Koref, M., and Chinnery, P.F. (2013). Universal heteroplasmy of human  
520 mitochondrial DNA. *Hum. Mol. Genet.* 22, 384–390.
- 521 9. Guo, Y., Li, C.-l., Sheng, Q., Winther, J.F., Cai, Q., Boice, J.D., and Shyr, Y. (2013). Very Low-Level  
522 Heteroplasmy mtDNA Variations Are Inherited in Humans. *J. Genet. Genomics* 40, 607–615.
- 523 10. Ye, K., Lu, J., Ma, F., Keinan, A., and Gu, Z. (2014). Extensive pathogenicity of mitochondrial  
524 heteroplasmy in healthy human individuals. *Proc. Natl. Acad. Sci.* 111, 10654–10659.
- 525 11. Floros, V.I., Pyle, A., Dietmann, S., Wei, W., Tang, W.W.C., Irie, N., Payne, B., Capalbo, A., Noli, L.,  
526 Coxhead, J., et al. (2018). Segregation of mitochondrial DNA heteroplasmy through a developmental  
527 genetic bottleneck in human embryos. *Nat. Cell Biol.* 20, 144-151.
- 528 12. Chou, Jui-Yu; Leu, J.-Y. (2015). The Red Queen in mitochondria : cyto-nuclear co-evolution , hybrid  
529 breakdown and human disease. *Front. Genet.* 6, 187.
- 530 13. St. John, J.C., Facucho-Oliveira, J., Jiang, Y., Kelly, R., and Salah, R. (2010). Mitochondrial DNA



- 531 transmission, replication and inheritance: A journey from the gamete through the embryo and into  
532 offspring and embryonic stem cells. *Hum. Reprod. Update* 16, 488–509.
- 533 14. Hashimoto, S., Morimoto, N., Yamanaka, M., Matsumoto, H., Yamochi, T., Goto, H., Inoue, M.,  
534 Nakaoka, Y., Shibahara, H., and Morimoto, Y. (2017). Quantitative and qualitative changes of  
535 mitochondria in human preimplantation embryos. *J. Assist. Reprod. Genet.* 34, 573–580.
- 536 15. Wallace, D. (2010). Mitochondrial DNA mutations in disease and aging. *Environ. Mol. Mutagen.*  
537 51, 440–450.
- 538 16. Trifunovic, A., Wredenberg, A., and Falkenberg, M. (2004). Premature ageing in mice expressing  
539 defective mitochondrial DNA polymerase. *Nature* 429, 417–423.
- 540 17. Fosslie, E. (2001). Mitochondrial medicine - Molecular pathology of defective oxidative  
541 phosphorylation. *Ann. Clin. Lab. Sci.* 31, 25–67.
- 542 18. Ameen, J. Van Den, Li, A.Y.Z., Ma, H., and Chinnery, P.F. (2020). Seminars in Cell &  
543 Developmental Biology Mitochondrial heteroplasmy beyond the oocyte bottleneck. *Semin. Cell Dev.*  
544 *Biol.* 97, 156–166.
- 545 19. Zambelli, F., Mertens, J., Dziedzicka, D., Sterckx, J., Markouli, C., Keller, A., Tropel, P., Jung, L.,  
546 Viville, S., Van de Velde, H., et al. (2018). Random mutagenesis, clonal events and embryonic or  
547 somatic origin determine the mitochondrial DNA variant type and load in human pluripotent stem  
548 cells. *Stem Cell Reports* 11, 102–114.
- 549 20. Kang, E., Wang, X., Tippner-Hedges, R., Ma, H., Folmes, C.D.L., Gutierrez, N.M., Lee, Y., Van  
550 Dyken, C., Ahmed, R., Li, Y., et al. (2016). Age-related accumulation of somatic mitochondrial DNA  
551 mutations in adult-derived human ipscs. *Cell Stem Cell* 18, 625–636.
- 552 21. Li, M., Schröder, R., Ni, S., Madea, B., and Stoneking, M. (2015). Extensive tissue-related and  
553 allele-related mtDNA heteroplasmy suggests positive selection for somatic mutations. *Proc. Natl.*  
554 *Acad. Sci. U. S. A.* 112, 2491–2496.
- 555 22. Samuels, D.C., Li, C., Li, B., Song, Z., Torstenson, E., Boyd Clay, H., Rokas, A., Thornton-Wells, T.A.,  
556 Moore, J.H., Hughes, T.M., et al. (2013). Recurrent tissue-specific mtDNA mutations are common in  
557 humans. *PLoS Genet.* 9, e1003929.
- 558 23. Lawless, C., Greaves, L., Reeve, A.K., Turnbull, D.M., Vincent, A.E., Turnbull, D.M., and Vincent,  
559 A.E. (2020). The rise and rise of mitochondrial DNA mutations. *Open Biol.* 10, 200061.
- 560 24. Tajima, H., Sueoka, K., Moon, S.Y., Nakabayashi, A., Sakurai, T., Murakoshi, Y., Watanabe, H.,  
561 Iwata, S., Hashiba, T., Kato, S., et al. (2007). The development of novel quantification assay for  
562 mitochondrial DNA heteroplasmy aimed at preimplantation genetic diagnosis of Leigh  
563 encephalopathy. *J. Assist. Reprod. Genet.* 24, 227–232.
- 564 25. Sallevelt, S.C.E.H., Dreesen, J.C.F.M., Drüsedau, M., Hellebrekers, D.M.E.I., Paulussen, A.D.C.,  
565 Coonen, E., van Golde, R.J.T., Geraedts, J.P.M., Gianaroli, L., Magli, M.C., et al. (2017). PGD for the

- 566 m.14487 T>C mitochondrial DNA mutation resulted in the birth of a healthy boy. *Hum. Reprod.*  
567 32, 698–703.
- 568 26. Steffann, J., Frydman, N., Gigarel, N., Burlet, P., Ray, P.F., Fanchin, R., Feyereisen, E., Kerbrat, V.,  
569 Tachdjian, G., Bonnefont, J.-P., et al. (2006). Analysis of mtDNA variant segregation during early  
570 human embryonic development: a tool for successful NARP preimplantation diagnosis. *J. Med.*  
571 *Genet.* 43, 244–247.
- 572 27. Sallevelt, S.C.E.H., Dreesen, J.C.F.M., Drüsedau, M., Spierts, S., Coonen, E., van Tienen, F.H.J., van  
573 Golde, R.J.T., de Coo, I.F.M., Geraedts, J.P.M., de Die-Smulders, C.E.M., et al. (2013). Preimplantation  
574 genetic diagnosis in mitochondrial DNA disorders: challenge and success. *J. Med. Genet.* 50, 125–132.
- 575 28. Treff, N.R., Campos, J., Tao, X., Levy, B., Ferry, K.M., and Scott, R.T. (2012). Blastocyst  
576 preimplantation genetic diagnosis (PGD) of a mitochondrial DNA disorder. *Fertil. Steril.* 98, 1236–  
577 1240.
- 578 29. Gigarel, N., Hesters, L., Samuels, D.C., Monnot, S., Burlet, P., Kerbrat, V., Lamazou, F., Benachi, A.,  
579 Frydman, R., Feingold, J., et al. (2011). Poor correlations in the levels of pathogenic mitochondrial  
580 DNA mutations in polar bodies versus oocytes and blastomeres in humans. *Am. J. Hum. Genet.* 88,  
581 494–498.
- 582 30. Heindryckx, B., Neupane, J., Vandewoestyne, M., Christodoulou, C., Jackers, Y., Gerris, J., Van den  
583 Abbeel, E., Van Coster, R., Deforce, D., and De Sutter, P. (2014). Mutation-free baby born from a  
584 mitochondrial encephalopathy, lactic acidosis and stroke-like syndrome carrier after blastocyst  
585 trophectoderm preimplantation genetic diagnosis. *Mitochondrion* 18, 12–17.
- 586 31. Vandewoestyne, M., Heindryckx, B., De Gheselle, S., Lepez, T., Neupane, J., Gerris, J., Van Coster,  
587 R., De Sutter, P., and Deforce, D. (2012). Poor correlation between polar bodies and blastomere  
588 mutation load in a patient with m.3243A>G tRNA<sup>Leu</sup>(UUR) point mutation. *Mitochondrion* 12, 477–  
589 479.
- 590 32. Van Landuyt, L., Van De Velde, H., De Vos, A., Haentjens, P., Blockeel, C., Tournaye, H., and  
591 Verheyen, G. (2013). Influence of cell loss after vitrification or slow-freezing on further in vitro  
592 development and implantation of human Day 3 embryos. *Hum. Reprod.* 28, 2943–2949.
- 593 33. Spits, C., Le Caignec, C., De Rycke, M., Van Haute, L., Van Steirteghem, A., Liebaers, I., and  
594 Sermon, K. (2006). Whole-genome multiple displacement amplification from single cells. *Nat. Protoc.*  
595 1, 1965–1970.
- 596 34. Mertens, J., Zambelli, F., Danneels, D., Caljon, B., Sermon, K., and Spits, C. (2019). Detection of  
597 Heteroplasmic Variants in the Mitochondrial Genome through Massive Parallel Sequencing. *Bio-*  
598 *Protocol* 9, 1–19.
- 599 35. Weissensteiner, H., Forer, L., Fuchsberger, C., Schöpf, B., Kloss-Brandstätter, A., Specht, G.,  
600 Kronenberg, F., and Schönherr, S. (2016). mtDNA-Server: next-generation sequencing data analysis of

- 601 human mitochondrial DNA in the cloud. *Nucleic Acids Res.* 44, W64-69.
- 602 36. Cibulskis, K., Lawrence, M.S., Carter, S.L., Sivachenko, A., Jaffe, D., Sougnez, C., Gabriel, S.,  
603 Meyerson, M., Lander, E.S., and Getz, G. (2013). Sensitive detection of somatic point mutations in  
604 impure and heterogeneous cancer samples. *Nat. Biotechnol.* 31, 213–219.
- 605 37. Venter, M., Malan, L., van Dyk, E., Elson, J.L., and van der Westhuizen, F.H. (2017). Using MutPred  
606 derived mtDNA load scores to evaluate mtDNA variation in hypertension and diabetes in a two-  
607 population cohort: The SABPA study. *J. Genet. Genomics* 44, 139–149.
- 608 38. Zambelli, F., Vancampenhout, K., Daneels, D., Brown, D., Mertens, J., Van Dooren, S., Caljon, B.,  
609 Gianaroli, L., Sermon, K., Voet, T., et al. (2017). Accurate and comprehensive analysis of single  
610 nucleotide variants and large deletions of the human mitochondrial genome in DNA and single cells.  
611 *Eur. J. Hum. Genet.* 25, 1229–1236.
- 612 39. Sallevelt, S.C.E.H., Dreesen, J.C.F.M., Coonen, E., Paulussen, A.D.C., Hellebrekers, D.M.E.I., Die-  
613 smulders, C.E.M. De, Smeets, H.J.M., and Lindsey, P. (2017). Preimplantation genetic diagnosis for  
614 mitochondrial DNA mutations : analysis of one blastomere suffices. *J. Med. Genet.* 54, 693–697.
- 615 40. Wai, T., Teoli, D., and Shoubridge, E.A. (2008). The mitochondrial DNA genetic bottleneck results  
616 from replication of a subpopulation of genomes. *Nature* 40, 1484–1488.
- 617 41. Lee, H.S., Ma, H., Juanes, R.C., Tachibana, M., Sparman, M., Woodward, J., Ramsey, C., Xu, J.,  
618 Kang, E.J., Amato, P., et al. (2012). Rapid Mitochondrial DNA Segregation in Primate Preimplantation  
619 Embryos Precedes Somatic and Germline Bottleneck. *Cell Rep.* 1, 506–515.
- 620 42. Cree, L.M., Samuels, D.C., de Sousa Lopes, S.C., Rajasimha, H.K., Wonnapijit, P., Mann, J.R., Dahl,  
621 H.H., and Chinnery, P.F. (2008). A reduction of mitochondrial DNA molecules during embryogenesis  
622 explains the rapid segregation of genotypes. *Nat Genet* 40, 249–254.
- 623 43. Van Blerkom, J., Davis, P., and Alexander, S. (2000). Differential mitochondrial distribution in  
624 human pronuclear embryos leads to disproportionate inheritance between blastomeres: relationship  
625 to microtubular organization, ATP content and competence. *Hum. Reprod.* 15, 2621–2633.
- 626 44. Ma, H., Hayama, T., Dyken, C. Van, Darby, H., Koski, A., Lee, Y., Gutierrez, N.M., Yamada, S., Li, Y.,  
627 Andrews, M., et al. (2020). Deleterious mtDNA mutations are common in mature oocytes. *Biol*  
628 *Reprod.* 102, 607–619.
- 629 45. Johnston, I.G., and Burgstaller, J.P. (2019). Evolving mtDNA populations within cells. *Biochem.*  
630 *Soc. Trans.* 47, 1367–1382.
- 631 46. Wanagat, J., Cao, Z., Pathare, P., and Aiken, J.M. (2001). Mitochondrial DNA deletion mutations  
632 colocalize with segmental electron transport system abnormalities, muscle fiber atrophy, fiber  
633 splitting, and oxidative damage in sarcopenia. *FASEB J.* 15, 322–323.
- 634 47. Baris, O.R., Ederer, S., Schrickel, J.W., Wiesner, R.J., Baris, O.R., Ederer, S., Neuhaus, J.F.G.,  
635 Schrickel, J.W., and Wiesner, R.J. (2015). Mosaic Deficiency in Mitochondrial Oxidative Metabolism

- 636 Promotes Cardiac Arrhythmia during Aging Article Mosaic Deficiency in Mitochondrial Oxidative  
637 Metabolism Promotes Cardiac Arrhythmia during Aging. *Cell Metab.* 21, 667–677.
